# Supplementary material
Source: PubMed Central journal article supplement (PMC4800270)
Supplement: Supp_Figure1.pdf [file Supp_Figure1.pdf]

## Supplementary Data

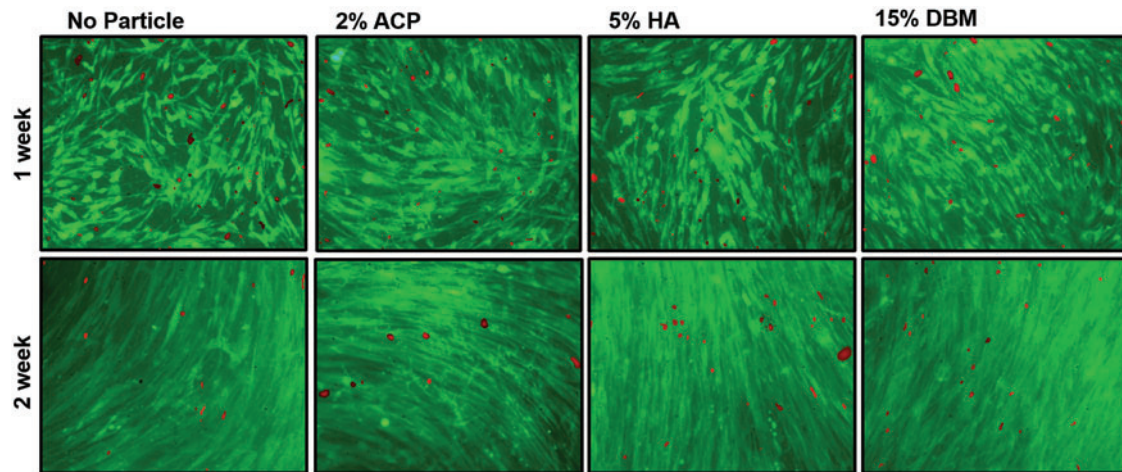

**SUPPLEMENTARY FIG. S1.** Representative images of hMSCs seeded on polyHIPES fabricated with no particle, 2 wt% ACP, 5 wt% HA, and 15 wt% DBM at 1 and 2 weeks. Live cells are stained green with calcein and dead cells are stained red with ethidium homodimer-1.
